1 **ANALYSIS OF IMMUNE ESCAPE VARIANTS FROM ANTIBODY-BASED THERAPEUTICS AGAINST**  
2 **COVID-19.**

3

4 Daniele Focosi<sup>1,#</sup>

5 Fabrizio Maggi<sup>2,3</sup>

6 Massimo Franchini<sup>4</sup>

7 Scott McConnell<sup>5</sup>

8 Arturo Casadevall<sup>5</sup>

9

10 <sup>1</sup>North-Western Tuscany Blood Bank, Pisa University Hospital, Pisa, Italy.

11 <sup>2</sup>Department of Medicine and Surgery, University of Insubria, Varese, Italy.

12 [fabrizio.maggi63@gmail.com](mailto:fabrizio.maggi63@gmail.com)

13 <sup>3</sup>Laboratory of Microbiology, ASST Sette Laghi, Varese, Italy.

14 <sup>4</sup>Division of Transfusion Medicine, Carlo Poma Hospital, 46100 Mantua, Italy;  
15 [massimo.franchini@asst-mantova.it](mailto:massimo.franchini@asst-mantova.it)

16 <sup>5</sup>Department of Medicine, Johns Hopkins School of Public Health and School of Medicine, Baltimore,  
17 MD, USA; [acasade1@jhu.edu](mailto:acasade1@jhu.edu); [smconn8@jhu.edu](mailto:smconn8@jhu.edu)

18

19 #corresponding author: via Paradisa 2, 56124 Pisa, Italy. E-mail: [daniele.focosi@gmail.com](mailto:daniele.focosi@gmail.com)

20

21 **Word count:** abstract 108; body 4370.

22 **Keywords:** SARS-CoV-2; COVID-19; Spike; convalescent plasma; viral clearance.; Q493R; E484K;  
23 deletions

24 **Abbreviations:** nAb : neutralizing antibodies; CCP : COVID19 convalescent plasma; PSM : propensity  
25 score-matched; RCT : randomized controlled trials.

26 **Author contributions:** D.F. conceived the manuscript; F.M. analyzed the literature; S.M. provided the  
27 figure and revised the final version; A.C. and M.F. revised the final version. All authors approved the  
28 final version.

29

30 **Abstract**

31 Accelerated SARS-CoV-2 evolution under selective pressure by massive deployment of neutralizing  
32 antibody-based therapeutics is a concern with potentially severe implications for public health. We  
33 review here reports of documented immune escape after treatment with monoclonal antibodies  
34 and COVID19 convalescent plasma (CCP). While the former is mainly associated with specific single  
35 amino acid mutations at residues within the receptor-binding domain (e.g., E484K/Q, Q493R, and  
36 S494P), the few cases of immune evasion after CCP were associated with recurrent deletions within  
37 the N-terminal domain of Spike protein (e.g.  $\Delta$ HV69-70,  $\Delta$ LGVY141-144 and  $\Delta$ AL243-244).  
38 Continuous genomic monitoring of non-responders is needed to better understand immune escape  
39 frequencies and fitness of emerging variants.

40

41

42

## 43 Introduction

44 SARS-CoV-2 Spike protein is the target of neutralizing antibody (nAb)-based therapeutics. Control of  
45 the COVID19 pandemic is being hampered by continued evolution of SARS-CoV-2, which includes  
46 mutations in the Spike protein that can affect immunogenicity and antibody-mediated  
47 neutralization. Evolutionary modeling suggests that SARS-CoV-2 strains harboring 1-2 deleterious  
48 mutations naturally exist, and their frequency increases steeply under positive selection by  
49 monoclonal antibodies (mAb) and vaccines [1]. In 2% of COVID cases, SARS-CoV-2 variants with  
50 multiple mutations occur, including in the Spike glycoprotein, which can become the dominant  
51 strains in as little as one month of persistent in-patient virus replication [2]. While mutations can  
52 occur as a natural phenomenon of SARS-CoV-2 RNA replication and editing, the pace of mutagen  
53 emergence can also be affected by small-chemical antivirals (e.g. remdesivir [3] or molnupiravir [4]).  
54 Since antibody-based therapies targeting the spike protein would also put selective pressure on  
55 SARS-CoV-2, it is reasonable to assume that widespread deployment of nAb-based therapeutics  
56 could accelerate Spike immune escape by selecting for variants resist neutralization.

57 Mutations that confer *in vitro* resistance to therapeutic anti-Spike mAbs have been characterized  
58 with various methods, and are informative about treatment-emergent immune escape. Deep  
59 mutational scanning (DMS) predicts protein expression, ACE2 binding, and mAb binding [5]. The  
60 method was first deployed with yeast display libraries [6], then evolved to phage display libraries  
61 ([https://jbloomlab.github.io/SARS-CoV-2-RBD MAP clinical Abs/](https://jbloomlab.github.io/SARS-CoV-2-RBD_MAP_clinical_Abs/)) [44] and finally mammalian cell  
62 surface display [7]. nAb binding is common within the fusion peptide and in the linker region before  
63 heptad repeat (HR) region 2. The complete escape maps forecast SARS-CoV-2 mutants emerging  
64 during treatment with mAbs, and allow the design of escape-resistant nAb cocktails. Complete map  
65 of SARS-CoV-2 RBD mutations that escape bamlanivimab and its cocktail with etesevimab have been  
66 generated [8, 9].

67 Although DMS was also applied to polyclonal antibodies in COVID19 convalescent plasma (CCP) [10],  
68 the problem is much more complex such that it is almost impossible to identify escape mutations in  
69 CCP or vaccinee elicited sera, given the huge heterogeneity in antibody response among CCP donors  
70 and vaccinees, respectively. *In vitro*, continuous passaging of SARS-CoV-2 in the presence of a CCP  
71 unit with nAb titer  $>1:10^4$  led to  $\Delta$ F140 Spike mutation at day 45, followed by E484K at day 73, and  
72 an insertion in the N-terminal domain (NTD): these accumulating mutations led to complete immune  
73 escape [11]. Similarly, K417N, E484K, and N501Y mutations were selected when pseudotyped SARS-  
74 CoV-2 was cultured in the presence of vaccine-elicited mAbs [12]. Although some have speculated  
75 that the large-scale use of CCP for COVID-19 could have played a role in the emergence of variants  
76 there is no evidence for such an effect and the most likely explanation for regular emergence of  
77 variants has been huge number of affected individuals since each infection case provides a natural  
78 opportunity for variant creation [13].

79 *In vivo*, while intra-host SARS-CoV-2 mutation development is typically very low [14], faster mutation  
80 rates (referred as “accelerated evolution”) have been found in longitudinal studies of  
81 immunodeficient patients who had persistent SARS-CoV-2 infections for several months and were  
82 treated with nAb-based therapeutics. In this study we analyze and compare the available mutational  
83 data from SARS-CoV-2 under *in vitro* and *in vivo* selection and demonstrate that mAb and polyclonal  
84 (CCP) therapies elicit different types of mutational patterns.

85

## 86 Methods

87 We mined PubMed (which also indexes the bioRxiv and medRxiv preprint servers) for keywords  
88 related to COVID19 (“COVID19”, “SARS-CoV-2”), immune escape (“immune escape”, “treatment-  
89 emergent resistance”) and nAb-based therapeutics (“convalescent plasma”, “casirivimab”,  
90 “imdevimab”, “bamlanivimab”, etesevimab”, “sotrovimab, “regdanvimab”) both *in vitro* and *in vivo*.  
91 Clinical cases were annotated for eventual underlying immune deficiency, concurrent treatments  
92 and outcome. Figure 1 reports the study selection process according to PRISMA 2020 guidelines [15].

93 The 3D structural coordinates of the full Spike protein (PDBID 6VXX; residues 27-1252) [16] and the  
94 receptor binding domain (PBDID 7BWJ; residues 319-529) [17], solved by cryo-electron microscopy  
95 and X-ray crystallography, respectively, were used to map mutational positions of interest. Mapping  
96 on the full Spike was used to illustrate the diverse set of mutations throughout the Spike  
97 glycoprotein, while the mutations localized to the RBD were illustrated using the more complete  
98 structural model obtained through crystallography. The mutations identified in each condition of *in*  
99 *vivo* or *in vitro* selection were tabulated and highlighted on the structures using color coding with  
100 PyMOL [18].

101

## 102 **Results**

103 Our literature search revealed 32 papers that were then manually inspected to determine whether  
104 they included relevant information that was then retrieved, evaluated and organized into Tables.

105 Table 1 summarizes Spike protein mutations associated with *in vitro* resistance to mAbs targeting  
106 this protein. These mutations were used to filter clinical case reports of treatment resistance for  
107 evidence of immune escape (Table 2).

108 Table 3 summarizes Spike mutations found in clinical cases after CCP treatment, where, immune  
109 escape can be hypothesized to have occurred based on treatment failure, with the caveat that there  
110 is no definitive proof of immune escape due to heterogeneity of the (uncharacterized) polyclonal  
111 response.

112 Table 4 summarizes data from reports within-host clonal evolution within immunosuppressed  
113 patients not treated with nAb-based therapeutics.

114 Figure 2 depicts the Spike RBD mutations of concern for mAb binding detected *in vitro* and *in vivo*  
115 and the Spike mutations detected after CCP usage.

116 **Table 1.** Spike mutations associated with clinically-approved mAb resistance *in vitro*. Mutations conferring resistance to both mAbs within the cocktail are  
 117 underlined.

| manufacturer                     | cocktail brand name       | active ingredient (brand name)               | Spike mutations associated with <i>in vitro</i> resistance | ref        |
|----------------------------------|---------------------------|----------------------------------------------|------------------------------------------------------------|------------|
| Eli Lilly (AbCellera/<br>Junshi) | n.a.                      | etesevimab (LyCoV016, CB6, JS016, LY3832479) | K417N/T, N460I, I472D, E484K, G485P, <u>Q493R/K</u>        | [8, 9, 19] |
|                                  |                           | bamlanivimab (LY-CoV555, LY3819253)          | L452R, E484K, G485P, <u>Q493R/K</u> , S494P                |            |
| Regeneron/Roche                  | REGN-COV2<br>(Ronapreve®) | imdevimab (REGN10987)                        | <u>E406W</u> , K444x, G446x                                | [8]        |
|                                  |                           | casirivimab (REGN10933)                      | <u>E406W</u> , F486x                                       |            |
| Celltrion                        | -                         | regdanvimab (CT-P59)                         | n.a.                                                       | n.a.       |

118

119 **Table 2.** Case reports of immune escape after anti-Spike mAb treatment.

| mAb type                             | age/sex (identifier) | condition (treatments)                                                               | day mAb administered | other antiviral treatments | SARS-CoV-2 strain | Spike mutations                 | first detected at day | outcome | ref                                                |
|--------------------------------------|----------------------|--------------------------------------------------------------------------------------|----------------------|----------------------------|-------------------|---------------------------------|-----------------------|---------|----------------------------------------------------|
| REGN-CoV2 cocktail                   | 45/M                 | antiphospholipid syndrome (steroids, rituximab, ruxolitinib, IVIg, cyclophosphamide) | 45                   | remdesivir (5+10+5 days)   | n.a.              | E484K/A, Y489H, Q493K and N501Y | 75                    | death   | Choi <i>et al</i> [20]<br>Clarke <i>et al</i> [21] |
| bamlanivimab monotherapy (700 mg iv) | n.a./n.a. (B2_11)    | immunocompetent                                                                      | median 4.5           | n.a.                       | n.a.              | E484K                           | 3 after mAb           | n.a.    | Choudhary <i>et al</i> [22]                        |
|                                      | n.a./n.a. (B2_10)    |                                                                                      |                      | n.a.                       | n.a.              | S494P                           | 6 after mAb           | n.a.    |                                                    |
|                                      | n.a./n.a. (B2_8)     |                                                                                      |                      | n.a.                       | n.a.              | E484K                           | 4 after mAb           | n.a.    |                                                    |
|                                      | n.a./n.a. (B2_7)     |                                                                                      |                      | n.a.                       | n.a.              | E484K                           | 6 after mAb           | n.a.    |                                                    |
|                                      | n.a./n.a. (B2_6)     |                                                                                      |                      | n.a.                       | n.a.              | S494P +E484K (frequency <20%)   | 3 after mAb           | n.a.    |                                                    |
|                                      | n.a./n.a.            |                                                                                      |                      | n.a.                       | n.a.              | E484Q                           | 4 after mAb           | n.a.    |                                                    |

|  |                     |                                                                                                                   |            |                                                |         |                                           |             |                                |                           |  |
|--|---------------------|-------------------------------------------------------------------------------------------------------------------|------------|------------------------------------------------|---------|-------------------------------------------|-------------|--------------------------------|---------------------------|--|
|  | (B2_5)              |                                                                                                                   |            |                                                |         |                                           |             |                                |                           |  |
|  | n.a./n.a.<br>(B2_4) |                                                                                                                   |            | n.a.                                           | n.a.    | E484K                                     | 8 after mAb | n.a.                           |                           |  |
|  | n.a./n.a.<br>(B2_3) |                                                                                                                   |            | n.a.                                           | n.a.    | S494P                                     | 6 after mAb | n.a.                           |                           |  |
|  | n.a./n.a.<br>(B2_2) |                                                                                                                   |            | n.a.                                           | n.a.    | E484Q                                     | 3 after mAb | n.a.                           |                           |  |
|  | 72/M                | chronic lymphocytic leukemia and hypogammaglobulinemia (venetoclax and rituximab 17 days earlier); steroids 21-26 | 4 (700 mg) | 1 BNT162b2 dose 20 days before CPP day 10      | Alpha   | E484K and Q493R                           | 6           | recovered at day 61            | Truffot <i>et al</i> [23] |  |
|  | 55/F                | acute myeloid leukemia                                                                                            | 14         | Remdesivir days 23-27                          | Alpha   | E484K and Q493R, S494P                    | 21          | negative at day 51             | Lohr <i>et al</i> [24]    |  |
|  | 70/M                | ANCA-associated vasculitis with end-stage renal disease (rituximab and prednisolone)                              | 2          | 3 units of CCP at day 16                       | B.1     | E484K →E484Q, reverted to E484K after CCP | 12          | died of MOF on day 20          | Jensen <i>et al</i> [25]  |  |
|  | 40/F                | AIDS                                                                                                              | 3          | remdesivir and 2 units of CCP                  | B..1.   | E484K                                     | 10          | recovered                      |                           |  |
|  | 60/M                | relapsed follicular lymphoma (obinutuzumab, thiotepa, cytarabine, etoposide)                                      | 76         | 2 CCP units on day 57 and 1 CCP unit on day 59 | B.1.177 | E484K                                     | 87          | recovered, negative at day 103 |                           |  |

|      |                                                                                                 |    |                                                                              |         |                                                      |      |                                                       |                                  |
|------|-------------------------------------------------------------------------------------------------|----|------------------------------------------------------------------------------|---------|------------------------------------------------------|------|-------------------------------------------------------|----------------------------------|
| 65/M | heart transplant recipient (about 30 years ago)<br>(cyclosporine, azathioprine, prednisolone)   | 2  | none                                                                         | B.1.177 | E484K                                                | 19   | discharged at day 40 after 2 negative NPS             |                                  |
| 65/M | chronic lymphatic leukemia                                                                      | 45 | remdesivir and 3 units of CCP days 52-62, imdevimab/casirivimab about day 70 | B.1.258 | E484K                                                | 52   | recovered, negative at day 91                         |                                  |
| 33/M | Hodgkin lymphoma (untreated)                                                                    | 20 | dexamethasone                                                                | B.1.362 | $\Delta$ F140 → $\Delta$ PFLGVY139-144, G485R, W258C | 45   | hospitalized for HL chemotherapy at end of follow-up  | Bronstein <i>et al</i> [26]      |
| 68/M | chronic lymphocytic leukemia (FCR in 2017, prednisone for AIHA, venetoclax + rituximab in 2019) | 10 | CPP days 12 and 26, IVIg day 21, remdesivir days 37-41                       | Alpha   | E484Q                                                | 22   | discharged day 43                                     |                                  |
| n.a. | immunocompetent                                                                                 | 2  | n.a.                                                                         | B.1.311 | E484K                                                | n.a. | resolved at home                                      | Sabin <i>et al</i> [27]          |
| 87/M | immunocompetent                                                                                 | 2  | none                                                                         | Alpha   | E484K +S494P                                         | 6    | discharged negative at day 27                         | Peiffer-Smadja <i>et al</i> [28] |
| 35/M | immunocompetent                                                                                 | 2  | none                                                                         | Alpha   | E484A/K                                              | 6    | discharged, negative at day 38                        |                                  |
| 61/M | immunocompetent                                                                                 | 2  | steroids                                                                     | Alpha   | E484K                                                | 12   | negative at day 8, hospitalized for unrelated reasons |                                  |
| 97/M | immunocompetent                                                                                 | 4  | none                                                                         | Alpha   | E484K                                                | 14   | died at day 35 because                                |                                  |



|                                                   |      |                                                 |         |                             |       |       |      |                                           |                            |
|---------------------------------------------------|------|-------------------------------------------------|---------|-----------------------------|-------|-------|------|-------------------------------------------|----------------------------|
|                                                   |      |                                                 |         |                             |       |       |      | of soft tissue infection                  |                            |
|                                                   | 64/M | heart transplant recipient                      | 2       | corticosteroids for 10 days | Alpha | Q493R | 26   | discharged, negative at day 48            |                            |
| bamlanivimab 700 mg + etesevimab 1400 mg cocktail | n.a. | n.a.                                            | 2       | n.a.                        | n.a.  | S494P | 11   | recovered, not detected in samples at day | Gottlieb <i>et al</i> [29] |
|                                                   | 73/M | cholangiocarcinoma (steroids)                   | 2       | none                        | Alpha | Q493R | 7    | died day 18                               | Focosi <i>et al</i> [30]   |
|                                                   | 63/M | allogeneic HSCT recipient for mycosis fungoides | n.a.    | none                        | Alpha | Q493R | 15   | discharged at day 2                       | Guigon <i>et al</i> [31]   |
|                                                   | n.a. | solid organ transplantation                     | n.a.    | none                        | Alpha | Q493R | 7    | n.a.                                      | Vellas <i>et al</i> [32]   |
|                                                   | n.a. | solid organ transplantation                     | n.a.    | none                        | Alpha | Q493R | 7    | n.a.                                      |                            |
|                                                   | n.a. | solid organ transplantation                     | n.a.    | none                        | Alpha | Q493R | 14   | n.a.                                      |                            |
|                                                   | n.a. | solid organ transplantation                     | n.a.    | none                        | Alpha | Q493K | 7    | n.a.                                      |                            |
|                                                   | n.a. | solid organ transplantation                     | n.a.    | none                        | Alpha | E484K | 21   | n.a.                                      |                            |
|                                                   | 34/F | B-ALL                                           | <5 days | 2 CCP units days 29-30      | Alpha | Q493R | n.a. | all were rescued with CCP                 | Pommeret <i>et al</i> [33] |
|                                                   | 62/F | Hodgkin lymphoma                                |         | 1 CCP unit day 26           | Alpha | Q493R | n.a. |                                           |                            |
|                                                   | 63/F | follicular lymphoma                             |         | 2 CCP units days 30-31      | Alpha | Q493R | n.a. |                                           |                            |
|                                                   | 67/F | follicular lymphoma                             |         | 2 CCP units days 15-16      | Alpha | n.a.  | n.a. |                                           |                            |
|                                                   | 57/M | chronic lymphocytic leukemia                    |         | 2 CCP units days 30-31      | Alpha | E484D | n.a. |                                           |                            |



121 **Table 3.** Case reports of immune escape after CCP treatment.

| age/sex (identifier) | condition                                                         | CCP schedule (and titer)                        | co-treatments                                    | SARS-CoV-2 strain | Spike mutations                                                                                                                                                                                 | first detected at day | outcome                                    | ref                        |
|----------------------|-------------------------------------------------------------------|-------------------------------------------------|--------------------------------------------------|-------------------|-------------------------------------------------------------------------------------------------------------------------------------------------------------------------------------------------|-----------------------|--------------------------------------------|----------------------------|
| 71/F                 | chronic lymphocytic leukemia and iatrogenic hypogammaglobulinemia | 70 (1:60) and 81 (1:160)                        | IVIg q4-6w                                       | n.a.              | ΔPFLGVYY139-145                                                                                                                                                                                 | 49                    | negative NPS since day 105                 | Avanzato <i>et al</i> [34] |
|                      |                                                                   |                                                 |                                                  |                   | ΔLGVY141-144                                                                                                                                                                                    | 70 (poor causality)   |                                            |                            |
| 73/M                 | CAR-T-cell recipient                                              | low titre days 2 and 58                         | remdesivir days 5-10,63-74<br>dexamethasone days | GH                | R190K and G1124D                                                                                                                                                                                | 13                    | died day 74                                | Hensley <i>et al</i> [35]  |
|                      |                                                                   |                                                 |                                                  |                   | ΔY144, D215G, and N501T                                                                                                                                                                         | 67                    |                                            |                            |
|                      |                                                                   |                                                 |                                                  |                   | ΔH146                                                                                                                                                                                           | 72                    |                                            |                            |
| 70/M                 | B-cell depletion and hypogammaglobulinemia                        | 63, 65, 102                                     | remdesivir day 38-48, 52-62 and 91-101           | n.a.              | D796H and ΔHV69-70                                                                                                                                                                              | 57                    | died on day 102                            | Kemp <i>et al</i> [36]     |
| 21/M                 | B-acute lymphoblastic leukemia (CART tisagenlecleucel)            | 78, 103, 110, 123, 130, 137, 144, 158, 165, 172 | remdesivir (2 5-days courses)                    | n.a.              | 3 major allele variants emerged between days 0 and 40 with an additional 4 major and 7 minor allele variants by day 144 (ΔLGV141-143, ΔY145, ΔLGVY141-144, ΔNL211-212, N440K, V483A, and E484Q) | 144                   | positive NPS at end of follow-up (day 250) | Truong <i>et al</i> [37]   |
| 50/M                 | kidney transplant recipient (tacrolimus, steroids)                | 1                                               | tocilizumab day 2                                | B.1.369           | Q493R, ΔAL243-244 had ~70% frequency; ΔLGVY141-144, E484K and Q493K had ~30%, ~20% and ~10%                                                                                                     | 21                    | died on day 94                             | Chen <i>et al</i> [38]     |

|          |                                                                                                                                    |                                                             |                                                                                                                                       |          | frequency                                                                     |                      |                                              |                               |
|----------|------------------------------------------------------------------------------------------------------------------------------------|-------------------------------------------------------------|---------------------------------------------------------------------------------------------------------------------------------------|----------|-------------------------------------------------------------------------------|----------------------|----------------------------------------------|-------------------------------|
| 75/M     | B-CLL (FCR, ibrutinib)                                                                                                             | 2 units on day 70, 2 units on days 127-128                  | remdesivir days 24-33 and 60-64                                                                                                       | n.a.     | H49Y, ΔY144, ΔLLA241-243, ΔAL243-244, L242H, A243P, F490S, N1178N, and C1250F | 80                   | still positive at end of follow-up (day 333) | Monrad <i>et al</i> [39]      |
| 60/M     | mantle-cell lymphoma and associated B-cell immunodeficiency (rituximab, bispecific mAb, cyclophosphamide, doxorubicin, prednisone) | 31, 122                                                     | remdesivir day 30 and 122                                                                                                             | n.a.     | mutations in ORF1a but not in Spike                                           | n.a.                 | still positive at end of follow-up (day 156) | Baang <i>et al</i> [40]       |
| 40/F     | diffuse large B-cell lymphoma (CART) and hypogammaglobulinemia                                                                     | high-titer day 2, 313                                       | IVIg, remdesivir day 2 and 313                                                                                                        | B.1.332  | ΔLHR244-246 and A243G                                                         | 313 (poor causation) | discharged day 324, cleared at day 335       | Nussenblatt <i>et al</i> [41] |
| 70/F (A) | follicular lymphoma (obinutuzumab-CHOP)                                                                                            | 23, 34, 49, 55, 56, 62, 65, 70, 73, 77, 84, 86, 90, 94, 106 | steroids                                                                                                                              | B.1.1.29 | L18F, R682Q, ΔY144                                                            | 50                   | died 5 months later                          | Khatamzas <i>et al</i> [42]   |
| 70/M     | mantle cell lymphoma (R-BAC)                                                                                                       | 88                                                          | darunavir/ritonavir, hydroxychloroquine, methylprednisolone, tocilizumab days 1-78, remdesivir days 45-50 and 78-87, 180-184 and 210- | B.1.1    | H69Y/P, V70G and S982A                                                        | 238                  | died on day 271, still positive at day 268   | Sepulcri <i>et al</i> [43]    |

|      |                                                              |                   |           |         |                                               |     |                         |                                 |
|------|--------------------------------------------------------------|-------------------|-----------|---------|-----------------------------------------------|-----|-------------------------|---------------------------------|
|      |                                                              |                   | 214, IVIg |         |                                               |     |                         |                                 |
| 40/M | autologous hematopoietic stem cell transplant due to a DLBCL | 2 doses on days ? | IVIg      | B.1.128 | $\Delta$ LGV141-143 →<br>$\Delta$ LGVY141-144 | 134 | negative PCR on day 196 | Mendes-Correa <i>et al</i> [44] |

122

123 **Table 4.** Intrahost variation in Spike sequence detected in immunocompromised patients not receiving nAb-based treatments.

| age/sex (identifier) | condition                                                       | antiviral treatments                                  | SARS-CoV-2 strain | Spike mutations                                                            | first detected at day | outcome                 | ref                                   |
|----------------------|-----------------------------------------------------------------|-------------------------------------------------------|-------------------|----------------------------------------------------------------------------|-----------------------|-------------------------|---------------------------------------|
| 47/F                 | diffuse large B cell lymphoma (rituximab plus polychemotherapy) | n.a.                                                  | B.1.1.163         | Y453F, ΔHV69-70, S50L, ΔLGVY141-144, T470N, and D737G                      | 120                   | negative PCR on day 132 | Bazykin <i>et al</i> [45]             |
| 61/F                 | diffuse large B cell lymphoma stage IVB                         | remdesivir for 10 days, high-dose steroids for 7 days | B.1.1.401         | V3G, S50L, N87S, A222V, ΔLTTRTQLPPAYTN18-30 and ΔLGVY141-144               | 164                   | negative PCR at day 197 | Borges <i>et al</i> [46]              |
| 3/F (1)              | B-cell acute lymphoblastic leukemia (chemotherapy)              | n.a.                                                  | 20C               | silent I410I (22792:C/A)                                                   | 27                    | negative PCR at day 91  | Truong <i>et al</i> [37]              |
| 2/M (3)              | B-cell acute lymphoblastic leukemia                             | remdesivir for 5 days                                 | 20C               | V483A and E484Q<br>V70P, ΔLGV141-143, N440K                                | 139<br>162            | negative PCR at day 196 |                                       |
| 37/F                 | advanced HIV and antiretroviral treatment failure               | dexamethasone                                         | B.1.1.273         | E484K                                                                      | 6                     | negative at day 233     | Karim <i>et al</i> [47]               |
|                      |                                                                 |                                                       |                   | K417T and F490S                                                            | 71                    |                         |                                       |
|                      |                                                                 |                                                       |                   | L455F and F456L                                                            | 106                   |                         |                                       |
|                      |                                                                 |                                                       |                   | D427Y and N501Y                                                            | 190                   |                         |                                       |
| 80/M                 | chronic lymphocytic leukemia and hypogammaglobulinemic          | remdesivir days 213-230, REGN-COV-2 day 265           | B.52              | L179                                                                       | 58                    | negative PCR day 311    | Kavanagh Williamson <i>et al</i> [48] |
|                      |                                                                 |                                                       |                   | S255F, S477N, H655Y, D1620A, ΔHV69-70                                      | 155                   |                         |                                       |
| 40/M                 | autologous hematopoietic stem cell transplant due to a DLBCL    | IVIg                                                  | B.1.128           | ΔLGV141-143 → ΔLGVY141-144                                                 |                       | negative PCR on day 196 | Mendes-Correa <i>et al</i> [44]       |
| n.a./n.a.            | transplant recipient                                            | remdesivir                                            | n.a.              | S13I, T95I, E484G, F490L, ΔLGVY141-144, ΔLHRS244-247, and ΔSPRRARSV680-687 | n.a.                  | n.a.                    | Weigang <i>et al</i> [49]             |

124

|           |                                |                           |      |      |           |      |                          |
|-----------|--------------------------------|---------------------------|------|------|-----------|------|--------------------------|
| n.a./n.a. | 18 B-cell non-Hodgkin lymphoma | 44% CCP<br>37% remdesivir | n.a. | n.a. | requested | n.a. | Lee <i>et al</i><br>[50] |
|-----------|--------------------------------|---------------------------|------|------|-----------|------|--------------------------|

125 **Figure legends.**

126 **Figure 1.** PRISMA flow diagram of study selection.

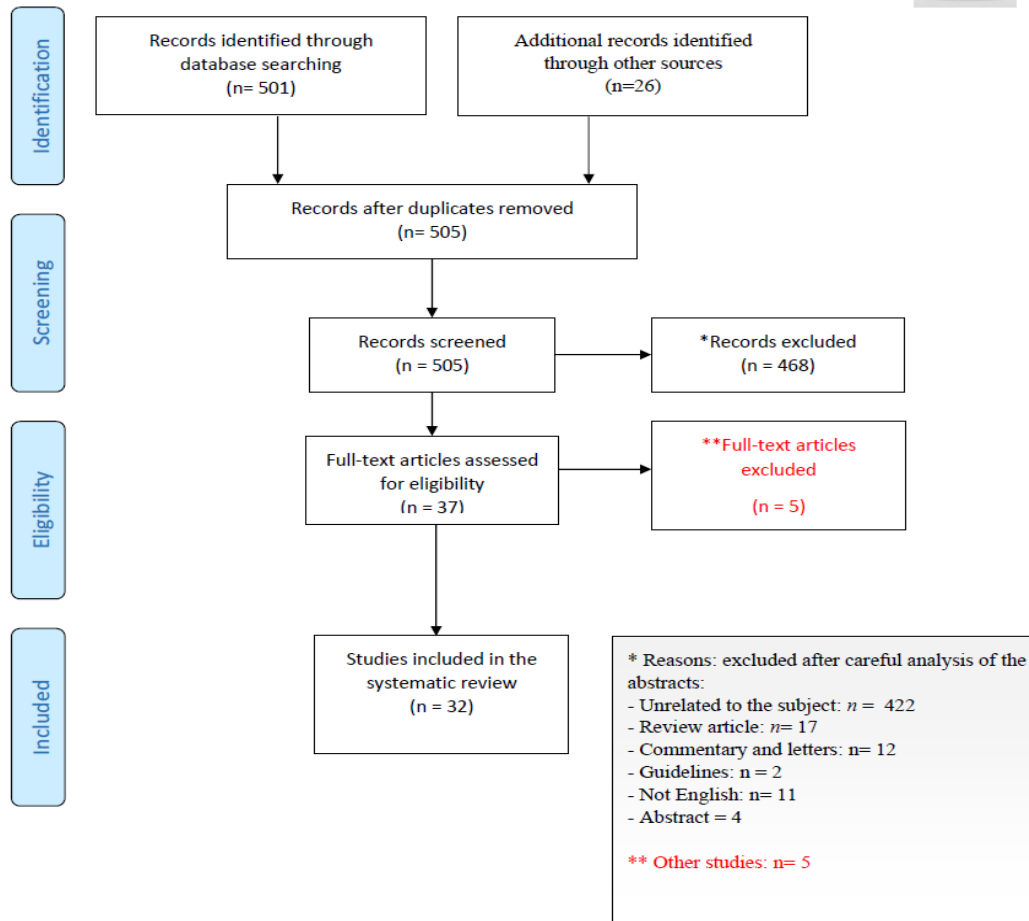

127

128



129 **Figure 2.**

130 Top panel) The full SARS-CoV-2 S (spike) glycoprotein homotrimer (PDBID 6VXX) [16] in the prefusion conformation is shown in surface representation, with  
131 each spike monomer colored a different shade of green. N-linked glycosylations which were resolved in the cryo-EM map in this structure (16/22 sequons  
132 per protomer) are displayed as magenta sticks. The receptor binding domains (RBDs), in the closed state, are highlighted in 3 shades of blue corresponding  
133 to the shade of the corresponding trimer. Escape mutations from case reports of patients treated with CCP are highlighted in orange. Spike mutations  
134 associated with immune escape from clinically approved mAb treatments in vitro or from case reports are highlighted in red, while escape mutations  
135 identified in both patients who received with clinically approved mAb treatments and CCP treatment are colored yellow. The full spike is shown oriented  
136 along the long axis (left) and rotated 90 degrees to display mutations concentrated in the RBDs. Note that mutations located on unresolved loops on the  
137 cryo-EM map of the full spike are not visualized (L18, V70, Y144, Y145, D146, R246, W258, G446, N460, I472, V483, E484, G485, F486, R682, N1178 and  
138 C1250).

139 Bottom panel) A table summarizing escape mutations localized to the RBD resulting from mAb treatments in vitro and case reports, as well as from CCP  
140 treatment. The crystal structure of single RBD domain (PDBID: 7BWJ)[17] from a more complete model (no missing loops) is displayed in surface view with  
141 the secondary structure superimposed in cartoon representation. Each escape mutation residue is highlighted by coloration according to the legend to  
142 right, and sidechains shown as sticks. In cases where a certain position corresponds to escape mutations from multiple treatments, the position is colored  
143 white and the label includes asterisks with the colors corresponding to each treatment where the escape mutation was identified. All figures were  
144 generated in PyMOL [18].

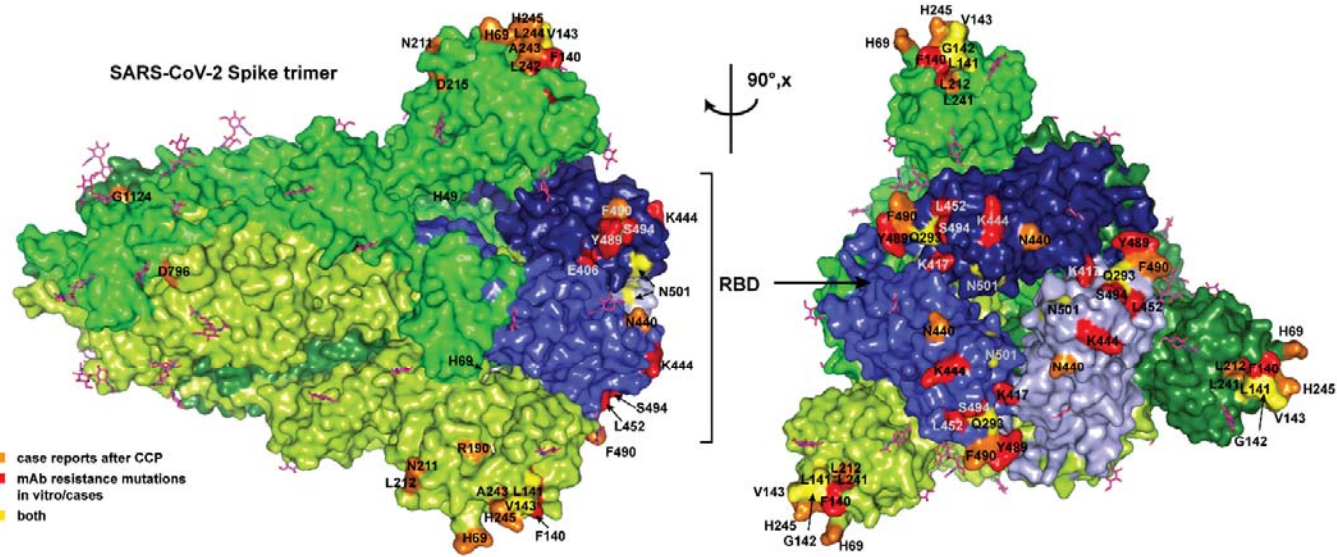

**Receptor Binding Domain (319-529)**

| El Lilly (AbCellera/ Junshu) | Regeneron/Itche | REGN-CoV3 cocktail | bamlanivimab monotherapy | bamlanivimab + etesevimab cocktail | immune escape after CCP treatment |
|------------------------------|-----------------|--------------------|--------------------------|------------------------------------|-----------------------------------|
| etesevimab                   | bamlanivimab    | casirivimab        |                          |                                    |                                   |
|                              | E406W           | E406W              |                          |                                    |                                   |
| K417N/T                      |                 |                    |                          |                                    | N440K                             |
|                              | K444            | G44G               |                          |                                    |                                   |
|                              | L452R           |                    |                          |                                    |                                   |
| N460T                        |                 |                    |                          |                                    |                                   |
| H72D                         |                 |                    |                          |                                    | V483A                             |
| E484K                        | E484K           |                    | E484K/A                  | E484K/Q/A                          | E484D                             |
| G485P                        | G485P           |                    |                          |                                    | F484Q/K                           |
|                              |                 | F486               |                          |                                    |                                   |
|                              |                 | Y489H              |                          |                                    |                                   |
|                              |                 |                    |                          |                                    | F490S                             |
| Q493R/K                      | Q493R/K         | S494P              | Q493K                    | Q493R                              | Q493R/K                           |
|                              | S494P           |                    | S494P                    | S494P                              | S494P                             |
|                              |                 | NS01Y              |                          |                                    | NS01T                             |

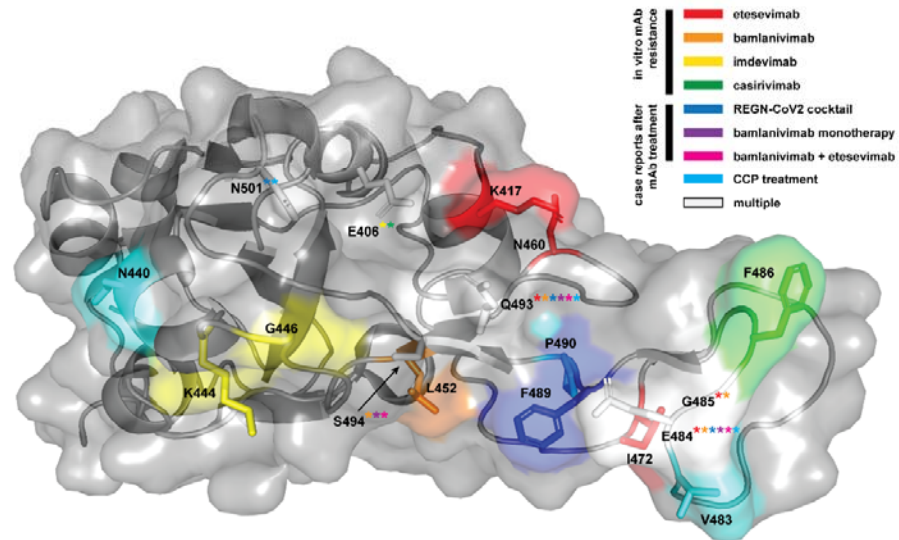

146 **Discussion**

147 Escape from nAb based therapeutics provides a crucial demonstration that these immune therapies  
148 target protective antigens, which the pathogen actively evades. Hence, the emergence of  
149 neutralizing-resistant variants in individuals receiving mAb and CCP provides powerful evidence for  
150 their antiviral activity. This evidence is independent of reduction in viral load, which has been  
151 reported with mAbs given early in disease but have been an inconsistent finding in randomized  
152 controlled trials (RCT) of CCP for COVID-19 [51].

153 Getting frequencies for this phenomenon from case series is not possible due to the high risk of  
154 selection biases, which would yield unrealistically high frequencies. In contrast, RCTs with their  
155 control groups are the suggested reference. With bamlanivimab, there was no emergence of  
156 resistance in the patients receiving 7000 mg, but resistance was reported in patients receiving 700  
157 mg (8 cases: 7% vs 0% with placebo) [22]. Putative treatment-emergent bamlanivimab-resistant  
158 variants were detected in 7.1% of patients (7/98) in the 700 mg group, 9.8% of patients (10/102) in  
159 the 2800 mg group, 11.3% of patients (11/97) in the 7000 mg group, 1% of patients (1/102) in the  
160 bamlanivimab and etesevimab combination group, and in 4.8% of patients (7/145) in the placebo  
161 group. The bamlanivimab monotherapy groups had a higher frequency of patients in whom a variant  
162 was detected at more than 1 time point during the viral time course (4.1% for the 700 mg group,  
163 5.9% for the 2800 mg group, and 7.2% for the 7000 mg group) than the placebo group or the  
164 bamlanivimab and etesevimab combination group (both 0%) [29]. Apart from registration trials, the  
165 largest case series to date evaluated the impact of mAbs on the nasopharyngeal (NP) viral load and  
166 virus quasi-species of mAb-treated patients using single-molecule real-time sequencing after  
167 bamlanivimab alone (4 patients), bamlanivimab/etesevimab (23 patients) and  
168 casirivimab/Imdevimab (5 patients) [32]. To date a single case of immune escape has been reported  
169 for the non-overlapping REGN-COV2 cocktail, and accordingly hamster models and clinical trials  
170 showed no emergence of variants [52]. Since mAb therapy by definition targets only a single epitope  
171 within the RBD, it is unsurprising that escape mutations observed after *in vitro* and *in vivo* selection  
172 by these mAbs were single amino acid substitutions localized almost exclusively to the RBD (Figure 2,  
173 bottom panel; Tables 1 and 2), as expected from *in vitro* studies with single mAb, but largely  
174 prevented by non-overlapping mAb cocktails [53].

175 In contrast to mAb therapeutics, immune escape under CCP has not been investigated in RCTs.  
176 Hence evidences exclusively stem from case series and case reports [54], and is further complicated  
177 by exposure to multiple CCP units from different donors, each one having a polyclonal response at  
178 differing titers and affinity. Unfortunately nAb titers were very rarely determined or reported,  
179 precluding correlations between emergence of resistance and subneutralizing CCP doses. Overall, it  
180 seems that escape variants from CCP selection have not been reported as commonly nor emerged as  
181 fast. E.g., none out of 8 recipients of HSCT or CART who were treated with CCP and tested SARS-CoV-  
182 2-positive for 2 months showed significant mutations compared to the original strain [55]. Review of  
183 the Spike protein changes associated with resistance after CCP therapy reveal that most of them had  
184 in-frame amino acid deletions in a flexible region that is partially solvent exposed and forms a  $\beta$   
185 strand: plasticity may contribute to the structural permissibility of the identified deletions. The NTD  
186 is a flexible region that can be affected by immune escape via either insertions (causing additional  
187 glycosylation sites [11]) or recurrently deleted regions (RDR)  $\Delta$ HV69–70 (RDR1),  $\Delta$ LGVY141–144 and  
188  $\Delta$ D146 (RDR2),  $\Delta$ I210 (RDR3) and  $\Delta$ AL243–244 (RDR4) [56] : RDR1, RDR2 and RDR4 correspond to  
189 NTD loops N2, N3 and N5, whereas RDR3 falls between N4 and N5.

190

191 Deletions of amino acids from a protein structure generally results in greater structural changes than  
192 single amino acid changes, since these reduce the size of the protein and can trigger changes that  
193 propagate through the whole structure. Furthermore, the mechanism for the emergence of deletion  
194 variants appears to be very different from the single amino acid changes that are frequent from  
195 error-prone RNA replication and could involve deletions from RNA editing. Since CCP targets a large  
196 number of epitopes in the Spike protein while mAbs target a single epitope these molecular  
197 differences parallel what is expected from their respective selection pressures in the sense that  
198 escape from polyclonal preparations requires larger antigenic structural changes than escape from  
199 mAbs. In contrast to escape mutations selected for by mAb therapy, CCP selection yields point  
200 mutations throughout the Spike protein. This reflects the vast antigenic surface area covered by the  
201 polyclonal antibodies within CCP. Escape mutations would be theoretically selected for on the basis  
202 of the most potent antibodies present in a particular CCP unit, which may vary markedly from donor  
203 to donor, which could explain the generally divergent evolution of SARS-CoV-2 in the presence of  
204 CCP. However, residues 141-144 and 243-244 are the sites of mutations or deletions in several cases,  
205 indicating these sites may offer effective escape from CCP derived from many donors, possibly by  
206 triggering a large-scale conformational rearrangement, as discussed above. As RBD binding  
207 antibodies are often neutralizing via ACE2 receptor occlusion, it is interesting that only 23% of CCP  
208 case studies identified escape mutations within the RBD (Figure 2, top panel; Table 3). This suggests  
209 that antibody binding to other sites on the Spike protein may have additional mechanisms of  
210 neutralization (i.e., by preventing conformational change after ACE2 engagement), or that additional  
211 antibody mediated immune responses (e.g., ADCC) are equally important as direct neutralization to  
212 the antiviral response to SARS-CoV-2.

213 Nothing can be inferred about the fitness of an emerging mutant in the absence of selective  
214 pressure, but it is of interest that one variant with the E484K mutant that emerged after  
215 bamlanivimab therapy was able to infect multiple household contacts [27]. *In vitro*, several mutants  
216 showed similar infectivity to wild type strain but resistance to different CCP donors [36]. In one  
217 instance of immune escape associated with CCP, a variant with D796H mutation manifested  
218 modestly reduced sensitivity to neutralization by CCP that was associated with reduced infectivity,  
219 which was only partly compensated by  $\Delta$ HV69-70 [36]. Even if immune escape in registration trials  
220 has been a rare phenomenon, it should be considered that in the real-world practice mAbs targeting  
221 the SARS-CoV-2 Spike protein are being reserved for use in high-risk (immunocompromised)  
222 patients. Considering the huge size of a pandemic, the likelihood of immune escape becomes  
223 relevant, raising the possibility that rare variants with enhanced fitness could drive next pandemic  
224 waves. Notably, several mutations have recurred in VOC and VOIs (e.g. E484K found in Beta and  
225 Gamma, E484Q found in Delta, or  $\Delta$ LHR244-246 [41] found in VOI lambda), raising the possibility  
226 that such variants emerged during treatment of patients (iatrogenic variants), but such inference will  
227 likely remain very hard to prove. E406W mutation has never been reported in GISAID, and other  
228 E406 mutations remain exceedingly rare (worldwide 318 cases of E406Q, 41 cases of E406D, and 2  
229 cases each from USA for E406G, E406A, E406K, and 1 case of E406V out of 4,410,787 sequences  
230 deposited in GISAID as of October 25, 2021). Similarly, Q493R has only been reported in 244  
231 sequences and Q493K in 138 sequences (source: [Outbreak.info](https://www.outbreak.info)). Lack of fixation of those mutation  
232 facilitates the imputation that these require mAb selective pressure and/or effective infection  
233 control techniques in the care of those patients prevented spill over to the general population.

234 Within host variation (so-called “quasi-species swarm”) is a natural phenomenon which has been  
235 reported for SARS-CoV-2 in immunocompetent patients and ultimately facilitates persistence of  
236 infection. Among 33 patients having positive NPS PCR for an average of 18 days, Voloch *et al*  
237 observed a distinguishing pattern of mutations over the course of the infection mainly driven by

238 increasing A→U and decreasing G→A signatures, including Spike mutations (V362L, T553I, H655Y,  
239 A688V, S691F, S884F, V1176F). G→A mutations are driven by RNA-editing enzyme activities typical  
240 of innate immunity [57]. Nevertheless, several covariates can facilitate immune escape.

241 Immunosuppression has been postulated to be an accelerator for viral evolution. Actually, Table 4  
242 shows that very few case reports have detailed intraclonal (within-host) evolution in patients  
243 receiving immunosuppressive treatment, and, in the absence of nAb-based therapeutics, Spike  
244 mutations rarely occurred [55].

245 On the other hand, co-administered small chemical antivirals can be mutagenic *per se*. Remdesivir  
246 can adopt both amino and imino tautomeric conformations to base-pair with RNA bases [58]. Both  
247 amino-remdesivir:G and imino-remdesivir:C pairs could be quite mutagenic. Serial *in vitro* passages  
248 of SARS-CoV-2Eng12 in cell culture media supplemented with remdesivir selected for drug-resistant  
249 viral populations. Remdesivir triggers the selection of SARS-CoV-2 variant with a E802D mutation in  
250 the RdRp sufficient to confer decreased sensitivity to remdesivir without affecting viral fitness. The  
251 analysis of more than 200,000 sequences also revealed the occurrence of 22 mutations in Spike,  
252 including changes in amino acids E484 and N501 corresponding to mutations identified in Alpha and  
253 Beta [59]. It has been hence been proposed than nAb-based therapeutics could amplify mutations  
254 induced by remdesivir [3]. In this regard, Table 4 shows that many of the mAb- or CCP-associated  
255 mutations emerged in individuals who were or had been treated with remdesivir (but neither mAbs  
256 nor CCP), consistent with the notion that antiviral therapy could potentiate the emergence of  
257 antibody-resistance mutations.

## 258 **Conclusion**

259 In summary, our survey of the available mutational data show that escape variants associated with  
260 mAb and CCP therapy manifest different type of mutations. For mAbs most mutations are single  
261 amino acid replacements in the RBD domain, while most variants eliciting in patients treated with  
262 CCP exhibited amino acid deletions. In fact, it is noteworthy that RBD mutations were relatively rare  
263 in CCP escape variants. Although the numbers are relatively small, which suggests caution in making  
264 generalizations, this dichotomy in geography of mAb and CCP mutations could reflect the fact that  
265 mAbs target a single epitope where the mAb-antigen interaction can be significantly altered by  
266 single amino acid changes while CCP targets many epitopes and has several mechanisms of action,  
267 such that evading polyclonal antibody immunity is likely to require much larger Spike protein  
268 structural changes. Despite the relatively small set of variants for which there is molecular data  
269 available, the large variation of molecular solutions that allow SARS-CoV-2 to escape antibody-  
270 mediated protection is striking and suggest the need for continued vigilance in genomic surveillance,  
271 especially in cases refractory to therapy.

272 We declare we don't have any conflict of interest related to this manuscript.

273

## 274 **References**

- 275 1. Van Egeren, D.; Novokhodko, A.; Stoddard, M.; Tran, U.; Zetter, B.; Rogers, M.; Pentelute, B.  
276 L.; Carlson, J. M.; Hixon, M. S.; Joseph-McCarthy, D.; Chakravarty, A., Risk of evolutionary  
277 escape from neutralizing antibodies targeting SARS-CoV-2 spike protein. **2020**,  
278 2020.11.17.20233726.
- 279 2. Landis, J.; Moorad, R.; Pluta, L. J.; Caro-Vegas, C.; McNamara, R. P.; Eason, A. B.; Bailey, A.;  
280 Villamor, F. C. S.; Juarez, A.; Wong, J. P.; Yang, B.; Broussard, G. S.; Damania, B.; Dittmer, D.,

- 281 Intra-host evolution provides for continuous emergence of SARS-CoV-2 variants. **2021**,  
282 2021.05.08.21256775.
- 283 3. Colson, P.; Devaux, C. A.; Lagier, J. C.; Gautret, P.; Raoult, D., A Possible Role of Remdesivir  
284 and Plasma Therapy in the Selective Sweep and Emergence of New SARS-CoV-2 Variants.  
285 *Journal of clinical medicine* **2021**, 10, (15).
- 286 4. Kabinger, F.; Stiller, C.; Schmitzová, J.; Dienemann, C.; Hillen, H. S.; Höbartner, C.; Cramer, P.,  
287 Mechanism of molnupiravir-induced SARS-CoV-2 mutagenesis. **2021**, 2021.05.11.443555.
- 288 5. Starr, T. N.; Greaney, A. J.; Hilton, S. K.; Ellis, D.; Crawford, K. H. D.; Dingens, A. S.; Navarro,  
289 M. J.; Bowen, J. E.; Tortorici, M. A.; Walls, A. C.; King, N. P.; Veessler, D.; Bloom, J. D., Deep  
290 Mutational Scanning of SARS-CoV-2 Receptor Binding Domain Reveals Constraints on Folding  
291 and ACE2 Binding. *Cell* **2020**, 182, (5), 1295-1310.e20.
- 292 6. Greaney, A. J.; Starr, T. N.; Gilchuk, P.; Zost, S. J.; Binshtein, E.; Loes, A. N.; Hilton, S. K.;  
293 Huddleston, J.; Eguia, R.; Crawford, K. H. D.; Dingens, A. S.; Nargi, R. S.; Sutton, R. E.;  
294 Suryadevara, N.; Rothlauf, P. W.; Liu, Z.; Whelan, S. P. J.; Carnahan, R. H.; Crowe, J. E., Jr.;  
295 Bloom, J. D., Complete Mapping of Mutations to the SARS-CoV-2 Spike Receptor-Binding  
296 Domain that Escape Antibody Recognition. *Cell host & microbe* **2020**.
- 297 7. Javanmardi, K.; Chou, C.-W.; Terrace, C.; Annapareddy, A.; Kaoud, T. S.; Guo, Q.; Lutgens, J.;  
298 Zorkic, H.; Horton, A. P.; Gardner, E. C.; Nguyen, G.; Boutz, D. R.; Goike, J.; Voss, W. N.; Kuo,  
299 H.-C.; Dalby, K. N.; Gollihar, J. D.; Finkelstein, I. J., Rapid characterization of spike variants via  
300 mammalian cell surface display. **2021**, 2021.03.30.437622.
- 301 8. Starr, T. N.; Greaney, A. J.; Addetia, A.; Hannon, W. W.; Choudhary, M. C.; Dingens, A. S.; Li, J.  
302 Z.; Bloom, J. D., Prospective mapping of viral mutations that escape antibodies used to treat  
303 COVID-19. *Science* **2021**, eabf9302.
- 304 9. Starr, T. N.; Greaney, A. J.; Dingens, A. S.; Bloom, J. D., Complete map of SARS-CoV-2 RBD  
305 mutations that escape the monoclonal antibody LY-CoV555 and its cocktail with LY-CoV016.  
306 *Cel Reports Medicine* **2021**, 2, (4), 100255.
- 307 10. Garrett, M. E.; Galloway, J.; Chu, H. Y.; Itell, H. L.; Stoddard, C. I.; Wolf, C. R.; Logue, J. K.;  
308 McDonald, D.; Matsen, F. A.; Overbaugh, J., High resolution profiling of pathways of escape  
309 for SARS-CoV-2 spike-binding antibodies. *bioRxiv* **2020**.
- 310 11. Andreano, E.; Piccini, G.; Licastro, D.; Casalino, L.; Johnson, N. V.; Paciello, I.; Dal Monego, S.;  
311 Pantano, E.; Manganaro, N.; Manenti, A.; Manna, R.; Casa, E.; Hyseni, I.; Benincasa, L.;  
312 Montomoli, E.; Amaro, R. E.; McLellan, J. S.; Rappuoli, R., SARS-CoV-2 escape in vitro from a  
313 highly neutralizing COVID-19 convalescent plasma. *Proceedings of the National Academy of  
314 Sciences of the United States of America* **2020**, 118, (36), e2103154118.
- 315 12. Wang, Z.; Schmidt, F.; Weisblum, Y.; Muecksch, F.; Barnes, C. O.; Finkin, S.; Schaefer-  
316 Babajew, D.; Cipolla, M.; Gaebler, C.; Lieberman, J. A.; Yang, Z.; Abernathy, M. E.; Huey-  
317 Tubman, K. E.; Hurley, A.; Turroja, M.; West, K. A.; Gordon, K.; Millard, K. G.; Ramos, V.; Silva,  
318 J. D.; Xu, J.; Colbert, R. A.; Patel, R.; Dizon, J. P.; Unson-O'Brien, C.; Shimeliovich, I.;  
319 Gazumyan, A.; Caskey, M.; Bjorkman, P. J.; Casellas, R.; Hatzioannou, T.; Bieniasz, P. D.;  
320 Nussenzweig, M. C. mRNA vaccine-elicited antibodies to SARS-CoV-2 and circulating variants.  
321 <https://www.biorxiv.org/content/biorxiv/early/2021/01/19/2021.01.15.426911.full.pdf>
- 322 13. Casadevall, A.; Henderson, J.; Joyner, M.; Pirofski, L.-a., SARS-Cov2 variants and convalescent  
323 plasma: reality, fallacies, and opportunities. *The Journal of clinical investigation* **2021**.
- 324 14. Valesano, A. L.; Rumfelt, K. E.; Dimcheff, D. E.; Blair, C. N.; Fitzsimmons, W. J.; Petrie, J. G.;  
325 Martin, E. T.; Lauring, A. S., Temporal dynamics of SARS-CoV-2 mutation accumulation within  
326 and across infected hosts. **2021**, 2021.01.19.427330.
- 327 15. Page, M. J.; McKenzie, J. E.; Bossuyt, P. M.; Boutron, I.; Hoffmann, T. C.; Mulrow, C. D.;  
328 Shamseer, L.; Tetzlaff, J. M.; Akl, E. A.; Brennan, S. E.; Chou, R.; Glanville, J.; Grimshaw, J. M.;  
329 Hróbjartsson, A.; Lalu, M. M.; Li, T.; Loder, E. W.; Mayo-Wilson, E.; McDonald, S.;  
330 McGuinness, L. A.; Stewart, L. A.; Thomas, J.; Tricco, A. C.; Welch, V. A.; Whiting, P.; Moher,

- 331 D., The PRISMA 2020 statement: an updated guideline for reporting systematic reviews.  
332 **2021**, 372, n71.
- 333 16. Walls, A. C.; Park, Y. J.; Tortorici, M. A.; Wall, A.; McGuire, A. T.; Velesler, D., Structure,  
334 Function, and Antigenicity of the SARS-CoV-2 Spike Glycoprotein. *Cell* **2020**, 181, (2), 281-  
335 292.e6.
- 336 17. Ju, B.; Zhang, Q.; Ge, J.; Wang, R.; Sun, J.; Ge, X.; Yu, J.; Shan, S.; Zhou, B.; Song, S.; Tang, X.;  
337 Yu, J.; Lan, J.; Yuan, J.; Wang, H.; Zhao, J.; Zhang, S.; Wang, Y.; Shi, X.; Liu, L.; Zhao, J.; Wang,  
338 X.; Zhang, Z.; Zhang, L., Human neutralizing antibodies elicited by SARS-CoV-2 infection.  
339 *Nature* **2020**, 584, (7819), 115-119.
- 340 18. The PyMOL Molecular Graphics System, Version 2.4.1 Schrödinger, LLC.
- 341 19. Wang, P.; Nair, M. S.; Lihong, L.; Iketani, S.; Luo, Y.; Guo, Y.; Wang, M.; Yu, J.; Zhang, B.;  
342 Kwong, P. D.; Graham, B. S.; Mascola, J. R.; Chang, J. Y.; Yin, M. T.; Sobieszczyk, M. E.;  
343 Kyratsous, C. A.; Shapiro, L.; Sheng, Z.; Huang, Y.; Ho, D. D., Antibody resistance of SARS-CoV-  
344 2 variants B.1.351 and B.1.1.7. *Nature* **2021**, 593, 130-135.
- 345 20. Choi, B.; Choudhary, M. C.; Regan, J.; Sparks, J. A.; Padera, R. F.; Qiu, X.; Solomon, I. H.; Kuo,  
346 H.-H.; Boucau, J.; Bowman, K.; Adhikari, U. D.; Winkler, M. L.; Mueller, A. A.; Hsu, T. Y.-T.;  
347 Desjardins, M.; Baden, L. R.; Chan, B. T.; Walker, B. D.; Lichterfeld, M.; Brigl, M.; Kwon, D. S.;  
348 Kanjilal, S.; Richardson, E. T.; Jonsson, A. H.; Alter, G.; Barczak, A. K.; Hanage, W. P.; Yu, X. G.;  
349 Gaiha, G. D.; Seaman, M. S.; Cernadas, M.; Li, J. Z., Persistence and Evolution of SARS-CoV-2  
350 in an Immunocompromised Host. **2020**, 383, (23), 2291-2293.
- 351 21. Clark, S. A.; Clark, L. E.; Pan, J.; Coscia, A.; McKay, L. G. A.; Shankar, S.; Johnson, R. I.; Brusic,  
352 V.; Choudhary, M. C.; Regan, J.; Li, J. Z.; Griffiths, A.; Abraham, J., SARS-CoV-2 evolution in an  
353 immunocompromised host reveals shared neutralization escape mechanisms. *Cell* **2021**,  
354 184, (10), 2605-2617.e18.
- 355 22. Choudhary, M. C.; Chew, K. W.; Deo, R.; Flynn, J. P.; Regan, J.; Crain, C. R.; Moser, C.; Hughes,  
356 M.; Ritz, J.; Ribeiro, R. M.; Ke, R.; Dragavon, J. A.; Javan, A. C.; Nirula, A.; Klekotka, P.;  
357 Greninger, A. L.; Fletcher, C. V.; Daar, E. S.; Wohl, D. A.; Eron, J. J.; Currier, J. S.; Parikh, U. M.;  
358 Sieg, S. F.; Perelson, A. S.; Coombs, R. W.; Smith, D. M.; Li, J. Z., Emergence of SARS-CoV-2  
359 Resistance with Monoclonal Antibody Therapy. *medRxiv* **2021**.
- 360 23. Truffot, A.; Andreani, J.; Le Marechal, M.; Caporossi, A.; Epaulard, O.; Poinard, P.; Sylvie, L.,  
361 SARS-CoV-2 Variants in Immunocompromised Patient Given Antibody Monotherapy.  
362 *Emerging infectious diseases* **2021**, 27, (10).
- 363 24. Lohr, B.; Niemann, D.; Verheyen, J., Bamlanivimab treatment leads to rapid selection of  
364 immune escape variant carrying E484K mutation in a B.1.1.7 infected and  
365 immunosuppressed patient. *Clinical infectious diseases : an official publication of the*  
366 *Infectious Diseases Society of America* **2021**.
- 367 25. Jensen, B.; Luebke, N.; Feldt, T.; Keitel, V.; Brandenburger, T.; Kindgen-Milles, D.; Lutterbeck,  
368 M.; Freise, N. F.; Schoeler, D.; Haas, R.; Diltthey, A.; Adams, O.; Walker, A.; Timm, J.; Luedde,  
369 T., Emergence of the E484K mutation in SARS-COV-2-infected immunocompromised patients  
370 treated with bamlanivimab in Germany. *The Lancet Regional Health – Europe* **2021**, 8.
- 371 26. Bronstein, Y.; Adler, A.; Katash, H.; Halutz, O.; Y, H.; Levytskyi, K., Evolution of spike  
372 mutations following antibody treatment in two immunocompromised patients with  
373 persistent COVID-19 infection. *Journal of medical virology* **2021**.
- 374 27. Sabin, A. P.; Richmond, C. S.; Kenny, P. A., Acquisition and onward transmission of a SARS-  
375 CoV-2 E484K variant among household contacts of a bamlanivimab-treated patient. **2021**,  
376 2021.10.02.21264415.
- 377 28. Peiffer-Smadja, N.; Bridier-Nahmias, A.; Ferré, V. M.; Charpentier, C.; Garé, M.; Rioux, C.;  
378 Allemand, A.; Lavallée, P.; Ghosn, J.; Kramer, L.; Descamps, D.; Yazdanpanah, Y.; Visseaux, B.,  
379 Emergence of E484K Mutation Following Bamlanivimab Monotherapy among High-Risk  
380 Patients Infected with the Alpha Variant of SARS-CoV-2. *Viruses* **2021**, 13, (8).

- 381 29. Gottlieb, R. L.; Nirula, A.; Chen, P.; Boscia, J.; Heller, B.; Morris, J.; Huhn, G.; Cardona, J.;  
382 Mocherla, B.; Stosor, V.; Shawa, I.; Kumar, P.; Adams, A. C.; Van Naarden, J.; Custer, K. L.;  
383 Durante, M.; Oakley, G.; Schade, A. E.; Holzer, T. R.; Ebert, P. J.; Higgs, R. E.; Kallewaard, N. L.;  
384 Sabo, J.; Patel, D. R.; Klekotka, P.; Shen, L.; Skovronsky, D. M., Effect of Bamlanivimab as  
385 Monotherapy or in Combination With Etesevimab on Viral Load in Patients With Mild to  
386 Moderate COVID-19: A Randomized Clinical Trial. *JAMA* **2021**, *325*, (7), 632-644.
- 387 30. Focosi, D.; Novazzi, F.; Genoni, A.; Dentali, F.; Dalla Gasperina, D.; Baj, A.; Maggi, F., Daniele  
388 Focosi, Federica Novazzi, Angelo Genoni, Francesco Dentali, Daniela Dalla gasperina,  
389 Andreina Baj, Fabrizio Maggi. **2021**.
- 390 31. Guigon, A.; Faure, E.; Lemaire, C.; Chopin, M.; Tinez, C.; Assaf, A.; Lazrek, M.; Hober, D.;  
391 Bocket, L.; Engelmann, I.; Kazali Alidjinou, E., Emergence of Q493R mutation in SARS-CoV-2  
392 spike protein during bamlanivimab/etesevimab treatment and resistance to viral clearance. *J*  
393 *Infect* **2021**, S0163-4453, (21), 00435-7.
- 394 32. Vellas, C.; Del Bello, A.; Alexa, D.; Steinmeyer, Z.; Tribaudeau, L.; Ranger, N.; Jeanne, N.;  
395 Martin-Blondel, G.; Delobel, P.; Kamar, N.; Izopet, J., Influence of neutralizing monoclonal  
396 antibodies on the SARS-CoV-2 quasispecies in patients with COVID-19. *Clin Microb Infect*  
397 **2021**.
- 398 33. Pommeret, F.; Colomba, J.; Bigenwald, C.; Laparra, A.; Bockel, S.; Bayle, A.; Michot, J. M.;  
399 Hueso, T.; Albiges, L.; Tiberghien, P.; Marot, S.; Jary, A.; Lacombe, K.; Barlesi, F.; Griscelli, F.;  
400 Colomba, E., Bamlanivimab+ etesevimab therapy induces SARS-CoV-2 immune escape  
401 mutations and secondary clinical deterioration in COVID-19 patients with B-cell  
402 malignancies. *Annals of Oncology* **2021**.
- 403 34. Avanzato, V. A.; Matson, M. J.; Seifert, S. N.; Pryce, R.; Williamson, B. N.; Anzick, S. L.;  
404 Barbian, K.; Judson, S. D.; Fischer, E. R.; Martens, C.; Bowden, T. A.; de Wit, E.; Riedo, F. X.;  
405 Munster, V. J., Case Study: Prolonged Infectious SARS-CoV-2 Shedding from an  
406 Asymptomatic Immunocompromised Individual with Cancer. *Cell* **2020**.
- 407 35. Hensley, M. K.; Bain, W. G.; Jacobs, J.; Nambulli, S.; Parikh, U.; Cillo, A.; Staines, B.; Heaps, A.;  
408 Sobolewski, M. D.; Rennick, L. J.; Macatangay, B. J. C.; Klamar-Blain, C.; Kitsios, G. D.; Methé,  
409 B.; Somasundaram, A.; Bruno, T.; Cardello, C.; Shan, F.; Workman, C.; Ray, P.; Ray, A.; Lee, J.;  
410 Sethi, R.; Schwarzmann, W. E.; Ladinsky, M. S.; Bjorkman, P. J.; Vignali, D. A.; Duprex, W. P.;  
411 Agha, M. E.; Mellors, J. W.; McCormick, K. D.; Morris, A.; Haidar, G., Intractable COVID-19  
412 and Prolonged SARS-CoV-2 Replication in a CAR-T-cell Therapy Recipient: A Case Study.  
413 *Clinical infectious diseases: an official publication of the Infectious Diseases Society of*  
414 *America* **2021**.
- 415 36. Kemp, S. A.; Collier, D. A.; Datir, R.; Gayed, S.; Jahun, A.; Hosmillo, M.; Ferreira, I. A.; Rees-  
416 Spear, C.; Mlcochova, P.; Lumb, I. U.; Roberts, D.; Chandra, A.; Temperton, N.; Sharrocks, K.;  
417 Blane, E.; Briggs, J. A.; Smith, K. G.; Bradley, J. R.; Smith, C.; Goldstein, R.; Goodfellow, I. G.;  
418 Smielewska, A.; Skittrall, J. P.; Gouliouris, T.; Gkrania-Klotsas, E.; Illingworth, C. J.; McCoy, L.  
419 E.; Gupta, R. K., Neutralising antibodies in Spike mediated SARS-CoV-2 adaptation. *Nature*  
420 **2020**, 2020.12.05.20241927.
- 421 37. Truong, T. T.; Ryutov, A.; Pandey, U.; Yee, R.; Goldberg, L.; Bhojwani, D.; Aguayo-Hiraldo, P.;  
422 Pinsky, B. A.; Pekosz, A.; Shen, L.; Boyd, S. D.; Wirz, O. F.; Roltgen, K.; Bootwalla, M.;  
423 Maglinte, D. T.; Ostrow, D.; Ruble, D.; Han, J. H.; Biegel, J. A.; Li, M.; Huang, C.; Sahoo, M. K.;  
424 Pannaraj, P. S.; O'Gorman, M.; Judkins, A. R.; Gai, X.; Dien Bard, J., Persistent SARS-CoV-2  
425 infection and increasing viral variants in children and young adults with impaired humoral  
426 immunity. *EBioMedicine* **2021**, *67*, 103355.
- 427 38. Chen, L.; Zody, M. C.; Mediavilla, J. R.; Cunningham, M. H.; Composto, K.; Chow, K. F.;  
428 Kordalewska, M.; Corvelo, A.; Oswald, D. M.; Fennessey, S.; Zetkovic, M.; Dar, S.; Kramer,  
429 Y.; Mathema, B.; Maniatis, T.; Perlin, D. S.; Kreiswirth, B. N., Emergence of multiple SARS-  
430 CoV-2 antibody escape variants in an immunocompromised host undergoing convalescent  
431 plasma treatment. *mSphere* **2021**, *6*, (4), e0048021.



- 432 39. Monrad, I.; Sahlertz, S. R.; Nielsen, S. S. F.; Pedersen, L.; Petersen, M. S.; Kobel, C. M.;  
433 Tarpgaard, I. H.; Storgaard, M.; Mortensen, K. L.; Schleimann, M. H.; Tolstrup, M.; Vibholm,  
434 L. K., Persistent Severe Acute Respiratory Syndrome Coronavirus 2 Infection in  
435 Immunocompromised Host Displaying Treatment Induced Viral Evolution. *Open forum*  
436 *infectious diseases* **2021**, 8, (7), ofab295.
- 437 40. Baang, J. H.; Smith, C.; Mirabelli, C.; Valesano, A. L.; Manthei, D. M.; Bachman, M. A.; Wobus,  
438 C. E.; Adams, M.; Washer, L.; Martin, E. T.; Luring, A. S., Prolonged Severe Acute Respiratory  
439 Syndrome Coronavirus 2 Replication in an Immunocompromised Patient. *J Infect Dis* **2021**,  
440 223, (1), 23-27.
- 441 41. Nussenblatt, V.; Roder, A.; Das, S.; de Wit, E.; Youn, J.-H.; Banakis, S.; Muchegian, A.;  
442 Mederos, C.; Wang, W.; Chung, M.; Perez-Perez, L.; Palmore, T.; Brudno, J.; Kochenderfer, J.;  
443 Ghedin, E., Year-long COVID-19 infection reveals within-host evolution of SARS-CoV-2 in a  
444 patient with B cell depletion. **2021**, 2021.10.02.21264267.
- 445 42. Khatamzas, E.; Rehn, A.; Muenchhoff, M.; Hellmuth, J.; Gaitzsch, E.; Weiglein, T.; Georgi, E.;  
446 Scherer, C.; Stecher, S.; Weigert, O.; Giral, P.; Zange, S.; Keppler, O. T.; Stemmler, J.; von  
447 Bergwelt-Baildon, M.; Wölfel, R.; Antwerpen, M., Emergence of multiple SARS-CoV-2  
448 mutations in an immunocompromised host. **2021**, 2021.01.10.20248871.
- 449 43. Sepulcri, C.; Dentone, C.; Mikulska, M.; Bruzzone, B.; Lai, A.; Fenoglio, D.; Bozzano, F.;  
450 Bergna, A.; Parodi, A.; Altosole, T.; Delfino, E.; Bartalucci, G.; Orsi, A.; Di Biagio, A.; Zehender,  
451 G.; Ballerini, F.; Bonora, S.; De Palma, R.; Silvestri, G.; De Maria, A.; Bassetti, M., The longest  
452 persistence of viable SARS-CoV-2 with recurrence of viremia and relapsing symptomatic  
453 COVID-19 in an immunocompromised patient – a case study. *Open forum infectious diseases*  
454 **2021**, ofab217, 2021.01.23.21249554.
- 455 44. Mendes-Correa, M. C.; Ghilardi, F.; Salomao, M. C.; Villas-Boas, L. S.; Vincente de Paula, A.;  
456 Tozetto-Mendoza, T. R.; Freire, W.; Sales, F. C. d. S.; Romano, C. M.; Claro, I. M.; de Souza, L.  
457 M.; Ramos, J. F.; Paiao, H. G. d. O.; Szor, R. S., SARS-CoV-2 shedding, infectivity and evolution  
458 in an immunocompromised adult patient. **2021**, 2021.06.11.21257717.
- 459 45. Bazykin, G.; Stanevich, O.; Danilenko, D.; Fadeev, A.; Komissarova, K.; Ivanova, A.; Sergeeva,  
460 M.; Safina, K.; Nabieva, E.; Klink, G.; Garushyants, S.; Zabutova, J.; Kholodnaia, A.; Skorokhod,  
461 I.; Ryabchikova, V.; Komissarov, A.; Lioznov, D. Emergence of Y453F and Δ69-70HV mutations  
462 in a lymphoma patient with long-term COVID-19. [https://virological.org/t/emergence-of-](https://virological.org/t/emergence-of-y453f-and-69-70hv-mutations-in-a-lymphoma-patient-with-long-term-covid-19/580)  
463 [y453f-and-69-70hv-mutations-in-a-lymphoma-patient-with-long-term-covid-19/580](https://virological.org/t/emergence-of-y453f-and-69-70hv-mutations-in-a-lymphoma-patient-with-long-term-covid-19/580)
- 464 46. Borges, V.; Isidro, J.; Cunha, M.; Cochicho, D.; Martins, L.; Banha, L.; Figueiredo, M.; Rebelo,  
465 L.; Trindade, M.; Duarte, S.; Vieira, L.; Alves, M.; Costa, I.; Guiomar, R.; Santos, M.; Cortê-  
466 Real, R.; Dias, A.; Póvoas, D.; Cabo, J.; Figueiredo, C.; Manata, M.; Maltez, F.; da Silva, M.;  
467 Gomes, J., Long-term evolution of SARS-CoV-2 in an immunocompromised patient with non-  
468 Hodgkin lymphoma. *mSphere* **2021**, e0024421.
- 469 47. Karim, F.; Moosa, M. Y.; Gosnell, B.; Sandile, C.; Giandhari, J.; Pillay, S.; Tegally, H.; Wilkinson,  
470 E.; San, E. J.; Msomi, N.; Mlisana, K.; Khan, K.; Bernstein, M.; Manickchand Nithendra, N.;  
471 Singh, L.; Ramphal, U.; Hanekom, W.; Lessells, R. J.; Sigal, A.; de Oliveira, T., Persistent SARS-  
472 CoV-2 infection and intra-host evolution in association with advanced HIV infection. **2021**,  
473 2021.06.03.21258228.
- 474 48. Kavanagh Williamson, M.; Hamilton, F.; Hutchings, S.; Pymont, H. M.; Hackett, M.; Arnold,  
475 D.; Maskell, N.; MacGowan, A. P.; Albur, m.; Jenkins, M.; Heys, I.; Knapper, F.; Elsayed, M.;  
476 Milligan, R.; Muir, P.; Vipond, B.; Matthews, D. A.; Moran, E.; Davidson, A. D. D., Chronic  
477 SARS-CoV-2 infection and viral evolution in a hypogammaglobulinaemic individual. **2021**,  
478 2021.05.31.21257591.
- 479 49. Weigang, S.; Fuchs, J.; Zimmer, G.; Schnepf, D.; Kern, L.; Beer, J.; Luxenburger, H.; Ankerhold,  
480 J.; Falcone, V.; Kemming, J.; Hofmann, M.; Thimme, R.; Neumann-Haefelin, C.; Ulferts, S.;  
481 Grosse, R.; Hornuss, D.; Tanriver, Y.; Rieg, S.; Wagner, D.; Huzly, D.; Schwemmler, M.;

- 482 Panning, M.; Kochs, G., Within-host evolution of SARS-CoV-2 in an immunosuppressed  
483 COVID-19 patient: a source of immune escape variants. **2021**, 2021.04.30.21256244.
- 484 50. Lee, C. Y.; Shah, M. K.; Hoyos, D.; Solovyov, A.; Douglas, M.; Taur, Y.; Maslak, P. G.; Babady,  
485 N. E.; Greenbaum, B.; Kamboj, M.; Vardhana, S. A., Prolonged SARS-CoV-2 infection in  
486 patients with lymphoid malignancies. **2021**, 2021.08.25.21262417.
- 487 51. Focosi, D.; Franchini, M.; Pirofski, L. A.; Maggi, F.; Casadevall, A., Is SARS-CoV-2 viral  
488 clearance in nasopharyngeal swabs an appropriate surrogate marker for clinical efficacy of  
489 neutralizing antibody-based therapeutics? *Rev Med Virol* **2021**.
- 490 52. Copin, R.; Baum, A.; Wloga, E.; Pascal, K. E.; Giordano, S.; Fulton, B. O.; Zhou, A.; Negron, N.;  
491 Lanza, K.; Chan, N.; Coppola, A.; Chiu, J.; Ni, M.; Atwal, G. S.; Romero Hernandez, A.;  
492 Saotome, K.; Zhou, Y.; Franklin, M. C.; Hooper, A. T.; McCarthy, S.; Hamon, S.; Hamilton, J. D.;  
493 Staples, H. M.; Alfson, K.; Carrion, R.; Ali, S.; Norton, T.; Somersan-Karakaya, S.;  
494 Sivapalasingam, S.; Herman, G. A.; Weinreich, D. M.; Lipsich, L.; Stahl, N.; Murphy, A. J.;  
495 Yancopoulos, G. D.; Kyratsous, C. A., REGEN-COV protects against viral escape in preclinical  
496 and human studies. *bioRxiv [Preprint]* **2021**, 2021.03.10.434834.
- 497 53. Baum, A.; Fulton, B. O.; Wloga, E.; Copin, R.; Pascal, K. E.; Russo, V.; Giordano, S.; Lanza, K.;  
498 Negron, N.; Ni, M.; Wei, Y.; Atwal, G. S.; Murphy, A. J.; Stahl, N.; Yancopoulos, G. D.;  
499 Kyratsous, C. A., Antibody cocktail to SARS-CoV-2 spike protein prevents rapid mutational  
500 escape seen with individual antibodies. **2020**, 369, (6506), 1014-1018.
- 501 54. Harvey, W. T.; Carabelli, A. M.; Jackson, B.; Gupta, R. K.; Thomson, E. C.; Harrison, E. M.;  
502 Ludden, C.; Reeve, R.; Rambaut, A.; Peacock, S. J.; Robertson, D. L.; Consortium, C.-G. U.,  
503 SARS-CoV-2 variants, spike mutations and immune escape. *Nature Reviews Microbiology*  
504 **2021**, 19, (7), 409-424.
- 505 55. Aydillo, T.; Gonzalez-Reiche, A. S.; Aslam, S.; van de Guchte, A.; Khan, Z.; Obla, A.; Dutta, J.;  
506 van Bakel, H.; Aberg, J.; García-Sastre, A.; Shah, G.; Hohl, T.; Papanicolaou, G.; Perales, M.-A.;  
507 Sepkowitz, K.; Babady, N. E.; Kamboj, M., Shedding of Viable SARS-CoV-2 after  
508 Immunosuppressive Therapy for Cancer. **2020**, 383, (26), 2586-2588.
- 509 56. McCarthy, K. R.; Rennick, L. J.; Nambulli, S.; Robinson-McCarthy, L. R.; Bain, W. G.; Haidar, G.;  
510 Duprex, W. P., Recurrent deletions in the SARS-CoV-2 spike glycoprotein drive antibody  
511 escape. *Science* **2021**, 371, (6534), 1139-1142.
- 512 57. Voloch, C. M.; da Silva Francisco Jr, R.; de Almeida, L. G. P.; Brustolini, O. J.; Cardoso, C. C.;  
513 Gerber, A. L.; Guimarães, A. P. d. C.; Leitão, I. d. C.; Mariani, D.; Ota, V. A.; Lima, C. X.;  
514 Teixeira, M. M.; Dias, A. C. F.; Galliez, R. M.; Faffe, D. S.; Pôrto, L. C.; Aguiar, R. S.; Castiñeira,  
515 T. M. P. P.; Ferreira, O. C.; Tanuri, A.; de Vasconcelos, A. T. R., Intra-host evolution during  
516 SARS-CoV-2 prolonged infection. *Virus Evolution* **2021**, 7, (2).
- 517 58. Singh, V.; Fedeles, B. I.; Essigmann, J. M., Role of tautomerism in RNA biochemistry. *RNA*  
518 (*New York, N.Y.*) **2015**, 21, (1), 1-13.
- 519 59. Szemiel, A. M.; Merits, A.; Orton, R. J.; MacLean, O.; Pinto, R. M.; Wickenhagen, A.; Lieber,  
520 G.; Turnbull, M. L.; Wang, S.; Mair, D.; da Silva Filipe, A.; Willett, B. J.; Wilson, S. J.; Patel, A.  
521 H.; Thomson, E. C.; Palmarini, M.; Kohl, A.; Stewart, M. E., *In vitro* evolution of  
522 Remdesivir resistance reveals genome plasticity of SARS-CoV-2. **2021**, 2021.02.01.429199.

523
